# Supplementary material
Source: publisher figshare collection journal article supplement (https://asha.figshare.com/articles/dataset/_/6170195)
Supplement: Supplementary file 1 [file 1]

## Online Supplemental Material

### Phonological Awareness Training Word Lists

#### Sound Matching

##### A. Attention through alliteration

|          |        |        |         |         |
|----------|--------|--------|---------|---------|
| más      | su     | gol    | dar     | chico   |
| mira     | sala   | gafas  | diez    | cheque  |
| misa     | sandía | ganso  | dolar   | chiflar |
| mejor    | sabe   | gastar | daño    | chicle  |
| malo     | semana | ganar  | decir   | chiste  |
| morado   | salir  | golpe  | debajo  | chaleco |
| muchacho | sentar | gordo  | derecha | chorizo |
| maestra  | saltar | gusano | deporte | chuleta |

##### B. Picture worksheet

|       |         |       |          |
|-------|---------|-------|----------|
| árbol | abeja   | comer | mujer    |
| ola   | vaso    | caja  | ocho     |
| lata  | lobo    | tigre | cuna     |
| mano  | moto    | vaca  | soda     |
| fuego | foto    | vela  | libro    |
| pelo  | falda   | roca  | perro    |
| burro | marrano | bebé  | carro    |
| sofa  | nube    | papas | sopa     |
| gallo | gato    | niño  | chile    |
| jamón | taco    | uvas  | gelatina |
| rana  | radio   | taza  | pastel   |

#### Blending and Segmenting

##### A. Picture puzzles

|           |       |          |
|-----------|-------|----------|
| u-no      | t-ú   | b-o-t-a  |
| ho-la     | n-o   | ll-a-v-e |
| lá-piz    | é-l   | f-l-o-r  |
| pa-to     | s-í   | t-r-e-s  |
| fo-ca     |       |          |
|           | u-v-a |          |
| pe-lo-ta  | f-e-o |          |
| co-ne-jo  | r-í-o |          |
| man-za-na | v-a-n |          |

## B. Pennies

d-a

qu-e

u-n-o

c-o-n

b-a-j-o

f-r-í-o

p-l-a-t-a

c-r-u-z-a

a-n-i-m-a-l

c-o-m-i-d-a

v-a

l-e

u-n-a

p-o-n

b-a-ñ-o

t-r-í-o

p-l-a-z-a

c-r-u-d-a

a-n-i-m-a-r

c-ó-m-i-c-a
